# Supplementary material for: Reduction of oxidative-nitrosative stress underlies anticataract effect of topically applied tocotrienol in streptozotocin-induced diabetic rats
Source: PubMed Central journal article supplement (PMC5370128; doi:10.1371/journal.pone.0174542), 2017-03-28
Supplement: pone.0174542.s001.pdf [file pone.0174542.s001.pdf]

Blood sugar

| Group | FBS before induce | RBS post induce | Week 1 | Week 2 | Week 3 | Week 4 | Week 5 | Week 6 | Week 7 | Week 8 |
|-------|-------------------|-----------------|--------|--------|--------|--------|--------|--------|--------|--------|
| N     | 4.8               | 7               | 7      | 7      | 7.4    | 7.4    | 8.2    | 7.5    | 7.9    | 7.9    |
| N     | 5                 | 7               | 7      | 6.9    | 7      | 8.4    | 7.7    | 7.9    | 6.7    | 6.6    |
| N     | 6                 | 7               | 7      | 7.2    | 7      | 7.9    | 8      | 7.9    | 7.4    | 7.4    |
| N     | 5                 | 6.8             | 5.2    | 7.1    | 6.8    | 6.5    | 6.7    | 6.6    | 6.8    | 5.2    |
| N     | 4.9               | 8               | 5.8    | 9.9    | 8      | 6.8    | 6.5    | 8.3    | 6.6    | 6.7    |
| N     | 5.6               | 8               | 6.3    | 6.5    | 8      | 7.8    | 6.8    | 7      | 7.5    | 7      |
| N     | 5                 | 5.6             | 6.8    | 8.6    | 6.7    | 5.6    | 6      | 6.2    | 6      | 6.3    |
| N     | 4.8               | 7               | 7      | 7      | 7.4    | 7.4    | 8.2    | 7.5    | 7.9    | 7.9    |
| N     | 5                 | 7               | 7      | 6.9    | 7      | 8.4    | 7.7    | 7.9    | 6.7    | 6.6    |
| N     | 6                 | 7               | 7      | 7.2    | 7      | 7.9    | 8      | 7.9    | 7.4    | 7.4    |
| N     | 5                 | 6.8             | 5.2    | 7.1    | 6.8    | 6.5    | 6.7    | 6.6    | 6.8    | 5.2    |
| N     | 4.9               | 8               | 5.8    | 9.9    | 8      | 6.8    | 6.5    | 8.3    | 6.6    | 6.7    |
| N     | 5.6               | 8               | 6.3    | 6.5    | 8      | 7.8    | 6.8    | 7      | 7.5    | 7      |
| N     | 5                 | 5.6             | 6.8    | 8.6    | 6.7    | 5.6    | 6      | 6.2    | 6      | 6.3    |
| N     | 4.8               | 7               | 7      | 7      | 7.4    | 7.4    | 8.2    | 7.5    | 7.9    | 7.9    |
| N     | 5                 | 7               | 7      | 6.9    | 7      | 8.4    | 7.7    | 7.9    | 6.7    | 6.6    |
| N     | 6                 | 7               | 7      | 7.2    | 7      | 7.9    | 8      | 7.9    | 7.4    | 7.4    |
| N     | 5                 | 6.8             | 5.2    | 7.1    | 6.8    | 6.5    | 6.7    | 6.6    | 6.8    | 5.2    |
| N     | 4.9               | 8               | 5.8    | 9.9    | 8      | 6.8    | 6.5    | 8.3    | 6.6    | 6.7    |
| N     | 5.6               | 8               | 6.3    | 6.5    | 8      | 7.8    | 6.8    | 7      | 7.5    | 7      |
| N     | 5                 | 5.6             | 6.8    | 8.6    | 6.7    | 5.6    | 6      | 6.2    | 6      | 6.3    |
| N     | 4.8               | 7               | 7      | 7      | 7.4    | 7.4    | 8.2    | 7.5    | 7.9    | 7.9    |
| N     | 5                 | 7               | 7      | 6.9    | 7      | 8.4    | 7.7    | 7.9    | 6.7    | 6.6    |
| N     | 6                 | 7               | 7      | 7.2    | 7      | 7.9    | 8      | 7.9    | 7.4    | 7.4    |
| N     | 5                 | 6.8             | 5.2    | 7.1    | 6.8    | 6.5    | 6.7    | 6.6    | 6.8    | 5.2    |
| N     | 4.9               | 8               | 5.8    | 9.9    | 8      | 6.8    | 6.5    | 8.3    | 6.6    | 6.7    |
| N     | 5.6               | 8               | 6.3    | 6.5    | 8      | 7.8    | 6.8    | 7      | 7.5    | 7      |

|    |     |      |      |      |      |      |      |      |      |      |
|----|-----|------|------|------|------|------|------|------|------|------|
| N  | 5   | 5.6  | 6.8  | 8.6  | 6.7  | 5.6  | 6    | 6.2  | 6    | 6.3  |
| N  | 4.8 | 7    | 7    | 7    | 7.4  | 7.4  | 8.2  | 7.5  | 7.9  | 7.9  |
| N  | 5   | 7    | 7    | 6.9  | 7    | 8.4  | 7.7  | 7.9  | 6.7  | 6.6  |
| N  | 6   | 7    | 7    | 7.2  | 7    | 7.9  | 8    | 7.9  | 7.4  | 7.4  |
| N  | 5   | 6.8  | 5.2  | 7.1  | 6.8  | 6.5  | 6.7  | 6.6  | 6.8  | 5.2  |
| N  | 4.9 | 8    | 5.8  | 9.9  | 8    | 6.8  | 6.5  | 8.3  | 6.6  | 6.7  |
| N  | 5.6 | 8    | 6.3  | 6.5  | 8    | 7.8  | 6.8  | 7    | 7.5  | 7    |
| N  | 5   | 5.6  | 6.8  | 8.6  | 6.7  | 5.6  | 6    | 6.2  | 6    | 6.3  |
| N  | 4.8 | 7    | 7    | 7    | 7.4  | 7.4  | 8.2  | 7.5  | 7.9  | 7.9  |
| N  | 5   | 7    | 7    | 6.9  | 7    | 8.4  | 7.7  | 7.9  | 6.7  | 6.6  |
| N  | 6   | 7    | 7    | 7.2  | 7    | 7.9  | 8    | 7.9  | 7.4  | 7.4  |
| N  | 5   | 6.8  | 5.2  | 7.1  | 6.8  | 6.5  | 6.7  | 6.6  | 6.8  | 5.2  |
| DV | 5.2 | 32.6 | 35   | 22.6 | 27   | 29.1 | 30   | 28.5 | 27.9 | 25.5 |
| DV | 4.8 | 31.5 | 29.9 | 23.3 | 26.6 | 25.7 | 27   | 26.4 | 30.3 | 27.2 |
| DV | 4.6 | 24   | 26.6 | 28.5 | 29   | 29   | 23   | 29   | 23.5 | 26.5 |
| DV | 5.1 | 33.2 | 28.9 | 30.7 | 28.8 | 23.3 | 35   | 35   | 26.1 | 26.3 |
| DV | 4.9 | 30.1 | 30.7 | 35   | 31.2 | 31.2 | 30   | 35   | 35   | 31.7 |
| DV | 5.6 | 31   | 31.1 | 31.6 | 16.6 | 23   | 35   | 35   | 30.9 | 35   |
| DV | 6   | 35   | 25.8 | 24   | 33   | 35   | 29.4 | 23.2 | 35   | 33.2 |
| DV | 6.6 | 22.6 | 28.7 | 28.3 | 30.5 | 30.7 | 24.8 | 35   | 29.7 | 30.9 |
| DV | 4.8 | 26.4 | 31.1 | 30   | 22.7 | 23   | 32.5 | 25.8 | 35   | 26   |
| DV | 5   | 30.5 | 32.3 | 31.5 | 35   | 35   | 33.6 | 31.8 | 32.9 | 35   |
| DV | 5   | 22.5 | 28.9 | 33   | 35   | 34   | 30.7 | 32.8 | 27   | 35   |
| DV | 5   | 30   | 31.4 | 28.1 | 32.2 | 33.2 | 35   | 33.8 | 27.9 | 28.5 |
| DV | 4.9 | 30.9 | 32.4 | 35   | 35   | 35   | 35   | 35   | 35   | 35   |
| DV | 5   | 29.9 | 29.4 | 35   | 30.3 | 32.6 | 30.9 | 31.9 | 35   | 35   |
| DV | 4.9 | 30.1 | 35   | 35   | 35   | 35   | 35   | 35   | 35   | 35   |
| DV | 4.8 | 27   | 31.1 | 26   | 27.9 | 31.1 | 35   | 30.6 | 27.2 | 27.1 |
| DV | 5.2 | 32   | 30.5 | 35   | 35   | 35   | 35   | 35   | 35   | 35   |
| DV | 4.8 | 23.9 | 28.7 | 24.1 | 24.1 | 28   | 25   | 29   | 35   | 29.5 |

|    |     |      |      |      |      |      |      |      |      |      |
|----|-----|------|------|------|------|------|------|------|------|------|
| DV | 5   | 27.4 | 29.4 | 28.3 | 35   | 33.7 | 33.2 | 31.3 | 26.4 | 24.8 |
| DV | 5.4 | 35   | 27.3 | 27.6 | 27.3 | 28.2 | 32.5 | 32.6 | 31.6 | 33   |
| DV | 5.6 | 35   | 35   | 33   | 34   | 31.6 | 29.6 | 31.8 | 32.8 | 28.6 |
| DV | 4.8 | 20.6 | 27.9 | 31.5 | 29.8 | 28.6 | 28.9 | 31.6 | 28   | 28.7 |
| DV | 5   | 26.2 | 27.6 | 24.5 | 33.5 | 35   | 33.7 | 35   | 35   | 35   |
| DV | 5.2 | 24.9 | 33   | 30.3 | 23.6 | 29   | 25.9 | 29.6 | 30.1 | 27.8 |
| DV | 5   | 28.6 | 35   | 26.4 | 26.5 | 32.1 | 31.3 | 25   | 28.8 | 32.7 |
| DV | 5.3 | 33   | 30.2 | 30   | 22.4 | 35   | 31.8 | 27.5 | 32   | 35   |
| DV | 5.6 | 35   | 34   | 30.6 | 35   | 32.1 | 35   | 35   | 33.4 | 35   |
| DV | 5.1 | 35   | 35   | 35   | 30.3 | 35   | 29.2 | 35   | 35   | 35   |
| DV | 5.2 | 35   | 31.9 | 35   | 35   | 34.1 | 35   | 35   | 35   | 35   |
| DV | 5.3 | 35   | 28   | 35   | 35   | 32.1 | 35   | 33.8 | 31.1 | 28.5 |
| DV | 5.4 | 35   | 28.7 | 34.3 | 33.9 | 35   | 35   | 35   | 35   | 35   |
| DV | 5.6 | 35   | 31.4 | 30.6 | 31.6 | 35   | 35   | 35   | 30.6 | 35   |
| DV | 5.4 | 35   | 26.5 | 33.6 | 32.6 | 35   | 35   | 35   | 35   | 35   |
| DV | 4.8 | 35   | 33.9 | 33.5 | 33.5 | 35   | 35   | 35   | 35   | 35   |
| DV | 4.9 | 23   | 23.3 | 24.2 | 35   | 32   | 33.2 | 32.5 | 28.2 | 30.3 |
| DV | 4.7 | 28.1 | 29.3 | 35   | 35   | 31.2 | 32.2 | 35   | 35   | 35   |
| DV | 5.3 | 23.4 | 18.1 | 25.9 | 27.5 | 30.8 | 31.6 | 25.1 | 28.2 | 30.7 |
| DV | 4.9 | 30.5 | 31.6 | 35   | 35   | 35   | 35   | 35   | 35   | 35   |
| DV | 4.7 | 31.2 | 26.5 | 33.1 | 27.2 | 35   | 35   | 35   | 35   | 35   |
| DT | 5   | 32.9 | 29.6 | 22.8 | 35   | 25   | 28   | 29.4 | 27.5 | 35   |
| DT | 5   | 32.7 | 33   | 23.9 | 35   | 33.1 | 35   | 28.3 | 28.5 | 28.2 |
| DT | 4.9 | 35   | 24.4 | 32.2 | 27.4 | 27.2 | 31.7 | 29   | 31.2 | 28.6 |
| DT | 5   | 25.9 | 25.9 | 35   | 26.5 | 30.1 | 35   | 30.6 | 34   | 33   |
| DT | 5.6 | 32.5 | 30.7 | 25   | 25   | 35   | 31.5 | 30.5 | 31.7 | 27.9 |
| DT | 4.8 | 27.7 | 24.5 | 25.9 | 31.4 | 35   | 30.1 | 35   | 26   | 35   |
| DT | 4.8 | 28.6 | 29.9 | 33.2 | 35   | 25.2 | 33.2 | 35   | 29.6 | 35   |
| DT | 5   | 35   | 30.7 | 33.2 | 35   | 35   | 35   | 35   | 35   | 35   |
| DT | 5.2 | 30.6 | 26.5 | 25   | 25.2 | 29.3 | 32.2 | 35   | 30   | 21.3 |

|    |     |      |      |      |      |      |      |      |      |      |
|----|-----|------|------|------|------|------|------|------|------|------|
| DT | 6   | 28.9 | 31.2 | 30.4 | 35   | 30.7 | 29.7 | 35   | 35   | 35   |
| DT | 4.5 | 30.8 | 30.6 | 33.8 | 35   | 33.6 | 33.4 | 34   | 31   | 35   |
| DT | 5   | 32.6 | 30.1 | 28   | 35   | 30.1 | 33.5 | 35   | 32.6 | 35   |
| DT | 5.2 | 24.1 | 25   | 27.2 | 29.1 | 31.2 | 32.1 | 32.6 | 35   | 27.9 |
| DT | 5   | 24.2 | 17.3 | 23.6 | 32.9 | 25.1 | 31.1 | 30.5 | 35   | 35   |
| DT | 4.7 | 27   | 25.9 | 27   | 26.8 | 32.2 | 29.2 | 31.2 | 31   | 30.4 |
| DT | 4.8 | 31.1 | 29.5 | 35   | 29.5 | 30   | 30.7 | 29   | 26.1 | 28.6 |
| DT | 4.9 | 30   | 29.1 | 32.7 | 31.1 | 29.8 | 31.5 | 32.4 | 35   | 35   |
| DT | 4.8 | 27.1 | 26.4 | 35   | 32   | 33.2 | 27.3 | 31   | 31.5 | 28.5 |
| DT | 4.9 | 24.1 | 33.1 | 31.2 | 35   | 35   | 34.1 | 35   | 35   | 35   |
| DT | 5   | 25.5 | 31   | 35   | 35   | 35   | 35   | 32.5 | 35   | 33.4 |
| DT | 5.2 | 25.6 | 32.2 | 25.2 | 31   | 31   | 27.1 | 27.9 | 32.5 | 31.3 |
| DT | 5   | 24.4 | 21.9 | 21   | 32.7 | 28.6 | 32   | 28.3 | 33.8 | 32.5 |
| DT | 5.3 | 25.9 | 31.1 | 24.8 | 22.9 | 21.9 | 31.7 | 27.4 | 23.7 | 24.6 |
| DT | 5.6 | 35   | 31.6 | 63.9 | 32.9 | 33.8 | 33.5 | 35   | 35   | 35   |
| DT | 5   | 35   | 32.5 | 29.3 | 31   | 33.5 | 29.7 | 35   | 35   | 35   |
| DT | 4.9 | 28.8 | 31   | 30.2 | 31.2 | 28   | 25.4 | 33.5 | 32.5 | 35   |
| DT | 4.8 | 25.8 | 26.9 | 28.4 | 30.4 | 34   | 32.9 | 35   | 35   | 35   |
| DT | 5   | 31.6 | 29.9 | 29.2 | 33.1 | 35   | 35   | 33.7 | 35   | 33.6 |
| DT | 5   | 31.1 | 25.1 | 29   | 29.7 | 31.4 | 23.9 | 30.9 | 29.1 | 31.2 |
| DT | 4.9 | 23.9 | 32.7 | 30.7 | 31.5 | 31.8 | 35   | 31.9 | 30.2 | 35   |
| DT | 4.9 | 23.9 | 29.7 | 33.7 | 28.5 | 32.8 | 33.9 | 32.8 | 31.2 | 32.5 |
| DT | 4.8 | 27.1 | 26.4 | 35   | 32   | 33.2 | 27.3 | 31   | 31.5 | 28.5 |
| DT | 5   | 27.1 | 28.6 | 26.8 | 30.2 | 35   | 32.1 | 26.7 | 28   | 26   |
| DT | 5.4 | 35   | 33.5 | 30.4 | 35   | 35   | 35   | 35   | 35   | 35   |
| DT | 5.5 | 24.8 | 31   | 35   | 35   | 35   | 35   | 35   | 35   | 35   |
| DT | 5   | 31.1 | 31   | 32.5 | 31.1 | 35   | 35   | 35   | 35   | 35   |
| DT | 5   | 31.5 | 23.3 | 25.5 | 31.3 | 28.1 | 31.2 | 31.7 | 35   | 35   |
| DT | 5.3 | 28.5 | 30.5 | 35   | 32   | 35   | 35   | 35   | 35   | 35   |
| DT | 4.8 | 25.8 | 26.9 | 28.4 | 30.4 | 34   | 32.9 | 35   | 35   | 35   |
