# Supplementary material for: Reduction of oxidative-nitrosative stress underlies anticataract effect of topically applied tocotrienol in streptozotocin-induced diabetic rats
Source: PubMed Central journal article supplement (PMC5370128; doi:10.1371/journal.pone.0174542), 2017-03-28
Supplement: pone.0174542.s002.pdf [file pone.0174542.s002.pdf]

Weight

| Group | Week 1 | Week 2 | Week 3 | Week 4 | Week 5 | Week 6 | Week 7 | Week 8 |
|-------|--------|--------|--------|--------|--------|--------|--------|--------|
| N     | 70     | 110    | 123    | 174    | 175    | 198    | 230    | 260    |
| N     | 70     | 90     | 110    | 152    | 132    | 200    | 210    | 220    |
| N     | 65     | 84     | 104    | 130    | 139    | 204    | 214    | 229    |
| N     | 50     | 104    | 154    | 104    | 154    | 191    | 203    | 213    |
| N     | 29     | 88     | 123    | 88     | 123    | 160    | 182    | 191    |
| N     | 30     | 74     | 109    | 140    | 186    | 200    | 219    | 240    |
| N     | 29     | 72     | 101    | 139    | 191    | 219    | 254    | 280    |
| N     | 38     | 68     | 72     | 94     | 128    | 128    | 150    | 155    |
| N     | 56     | 104    | 127    | 130    | 140    | 146    | 152    | 170    |
| N     | 37     | 90     | 125    | 153    | 171    | 196    | 218    | 221    |
| N     | 28     | 50     | 85     | 101    | 130    | 140    | 143    | 150    |
| N     | 71     | 83     | 104    | 108    | 121    | 143    | 160    | 172    |
| N     | 70     | 110    | 123    | 174    | 175    | 198    | 230    | 260    |
| N     | 70     | 90     | 110    | 152    | 132    | 200    | 210    | 220    |
| N     | 65     | 84     | 104    | 130    | 139    | 204    | 214    | 229    |
| N     | 50     | 104    | 154    | 104    | 154    | 191    | 203    | 213    |
| N     | 29     | 88     | 123    | 88     | 123    | 160    | 182    | 191    |
| N     | 30     | 74     | 109    | 140    | 186    | 200    | 219    | 240    |
| N     | 29     | 72     | 101    | 139    | 191    | 219    | 254    | 280    |
| N     | 38     | 68     | 72     | 94     | 128    | 128    | 150    | 155    |
| N     | 56     | 104    | 127    | 130    | 140    | 146    | 152    | 170    |
| N     | 37     | 90     | 125    | 153    | 171    | 196    | 218    | 221    |
| N     | 28     | 50     | 85     | 101    | 130    | 140    | 143    | 150    |
| N     | 71     | 83     | 104    | 108    | 121    | 143    | 160    | 172    |
| N     | 70     | 110    | 123    | 174    | 175    | 198    | 230    | 260    |
| N     | 70     | 90     | 110    | 152    | 132    | 200    | 210    | 220    |
| N     | 65     | 84     | 104    | 130    | 139    | 204    | 214    | 229    |
| N     | 50     | 104    | 154    | 104    | 154    | 191    | 203    | 213    |
| N     | 29     | 88     | 123    | 88     | 123    | 160    | 182    | 191    |
| N     | 30     | 74     | 109    | 140    | 186    | 200    | 219    | 240    |
| N     | 29     | 72     | 101    | 139    | 191    | 219    | 254    | 280    |
| N     | 38     | 68     | 72     | 94     | 128    | 128    | 150    | 155    |
| N     | 56     | 104    | 127    | 130    | 140    | 146    | 152    | 170    |
| N     | 30     | 88     | 110    | 120    | 150    | 197    | 210    | 217    |
| N     | 60     | 105    | 127    | 140    | 166    | 188    | 204    | 215    |
| N     | 58     | 99     | 130    | 145    | 178    | 183    | 202    | 223    |
| N     | 43     | 70     | 100    | 115    | 134    | 169    | 190    | 210    |
| N     | 35     | 70     | 105    | 120    | 135    | 175    | 195    | 202    |
| N     | 57     | 88     | 100    | 118    | 126    | 159    | 180    | 201    |

|    |    |     |     |     |     |     |     |     |
|----|----|-----|-----|-----|-----|-----|-----|-----|
| DV | 21 | 13  | 21  | 8   | 51  | 76  | 89  | 76  |
| DV | 16 | 93  | 113 | 143 | 143 | 145 | 151 | 165 |
| DV | 16 | 93  | 116 | 136 | 188 | 211 | 220 | 233 |
| DV | 39 | 53  | 116 | 118 | 126 | 118 | 132 | 129 |
| DV | 20 | 101 | 132 | 132 | 80  | 105 | 132 | 90  |
| DV | 25 | 102 | 130 | 148 | 158 | 158 | 168 | 188 |
| DV | 87 | 120 | 136 | 130 | 115 | 153 | 105 | 146 |
| DV | 38 | 98  | 145 | 161 | 171 | 193 | 194 | 231 |
| DV | 38 | 75  | 93  | 88  | 100 | 86  | 117 | 130 |
| DV | 21 | 59  | 95  | 52  | 106 | 126 | 114 | 126 |
| DV | 74 | 90  | 133 | 149 | 171 | 187 | 193 | 177 |
| DV | 47 | 83  | 104 | 115 | 69  | 137 | 118 | 129 |
| DV | 38 | 39  | 50  | 42  | 39  | 61  | 57  | 59  |
| DV | 55 | 55  | 103 | 58  | 122 | 126 | 129 | 142 |
| DV | 45 | 78  | 91  | 125 | 125 | 74  | 114 | 68  |
| DV | 75 | 77  | 97  | 114 | 109 | 121 | 139 | 151 |
| DV | 78 | 98  | 118 | 149 | 169 | 151 | 69  | 90  |
| DV | 87 | 106 | 96  | 116 | 136 | 149 | 146 | 152 |
| DV | 29 | 30  | 42  | 35  | 49  | 43  | 32  | 45  |
| DV | 37 | 72  | 91  | 99  | 113 | 102 | 107 | 140 |
| DV | 38 | 79  | 99  | 122 | 124 | 130 | 144 | 146 |
| DV | 20 | 28  | 38  | 38  | 38  | 50  | 68  | 65  |
| DV | 40 | 58  | 57  | 79  | 71  | 83  | 90  | 60  |
| DV | 29 | 56  | 77  | 69  | 63  | 63  | 109 | 111 |
| DV | 38 | 66  | 77  | 86  | 76  | 77  | 96  | 103 |
| DV | 19 | 33  | 59  | 66  | 40  | 77  | 86  | 102 |
| DV | 35 | 99  | 122 | 141 | 147 | 155 | 168 | 182 |
| DV | 51 | 95  | 130 | 137 | 144 | 146 | 167 | 184 |
| DV | 48 | 76  | 74  | 88  | 114 | 158 | 135 | 140 |
| DV | 36 | 46  | 56  | 50  | 60  | 79  | 76  | 92  |
| DV | 31 | 24  | 49  | 44  | 63  | 73  | 69  | 89  |
| DV | 46 | 67  | 54  | 66  | 78  | 69  | 95  | 88  |
| DV | 61 | 45  | 90  | 130 | 144 | 174 | 182 | 208 |
| DV | 55 | 80  | 84  | 108 | 125 | 142 | 140 | 154 |
| DV | 52 | 77  | 103 | 112 | 112 | 117 | 114 | 138 |
| DV | 27 | 43  | 25  | 31  | 31  | 43  | 52  | 48  |
| DV | 63 | 114 | 153 | 159 | 162 | 168 | 182 | 193 |
| DV | 37 | 54  | 89  | 97  | 108 | 119 | 114 | 118 |
| DV | 26 | 39  | 61  | 102 | 105 | 109 | 98  | 107 |
| DT | 34 | 56  | 77  | 76  | 94  | 101 | 101 | 101 |
| DT | 39 | 93  | 155 | 172 | 160 | 187 | 226 | 227 |

|    |    |     |     |     |     |     |     |     |
|----|----|-----|-----|-----|-----|-----|-----|-----|
| DT | 32 | 78  | 104 | 97  | 103 | 138 | 137 | 155 |
| DT | 23 | 92  | 121 | 134 | 138 | 154 | 159 | 190 |
| DT | 35 | 80  | 125 | 137 | 160 | 165 | 185 | 201 |
| DT | 44 | 89  | 111 | 125 | 148 | 180 | 192 | 205 |
| DT | 40 | 98  | 136 | 89  | 135 | 142 | 159 | 173 |
| DT | 72 | 101 | 97  | 127 | 130 | 134 | 124 | 163 |
| DT | 45 | 70  | 125 | 155 | 166 | 174 | 185 | 204 |
| DT | 20 | 49  | 57  | 70  | 75  | 90  | 61  | 75  |
| DT | 73 | 110 | 135 | 135 | 143 | 149 | 142 | 142 |
| DT | 69 | 79  | 80  | 114 | 96  | 101 | 55  | 84  |
| DT | 64 | 110 | 116 | 148 | 148 | 149 | 147 | 133 |
| DT | 38 | 77  | 77  | 104 | 131 | 122 | 124 | 124 |
| DT | 69 | 104 | 115 | 121 | 135 | 148 | 174 | 182 |
| DT | 65 | 84  | 108 | 118 | 126 | 109 | 129 | 98  |
| DT | 68 | 80  | 103 | 132 | 142 | 126 | 141 | 126 |
| DT | 36 | 87  | 115 | 130 | 144 | 117 | 134 | 147 |
| DT | 59 | 78  | 130 | 153 | 167 | 191 | 187 | 201 |
| DT | 57 | 106 | 124 | 135 | 151 | 166 | 176 | 181 |
| DT | 38 | 54  | 95  | 106 | 120 | 114 | 136 | 130 |
| DT | 20 | 39  | 78  | 117 | 108 | 123 | 131 | 133 |
| DT | 53 | 98  | 105 | 120 | 115 | 138 | 142 | 163 |
| DT | 35 | 75  | 101 | 116 | 122 | 136 | 152 | 155 |
| DT | 16 | 34  | 40  | 40  | 54  | 55  | 52  | 62  |
| DT | 39 | 60  | 86  | 101 | 114 | 110 | 116 | 155 |
| DT | 24 | 84  | 122 | 123 | 147 | 155 | 167 | 194 |
| DT | 37 | 57  | 78  | 96  | 117 | 132 | 145 | 134 |
| DT | 62 | 67  | 65  | 75  | 96  | 104 | 110 | 124 |
| DT | 56 | 74  | 83  | 88  | 101 | 96  | 121 | 122 |
| DT | 43 | 54  | 69  | 77  | 76  | 98  | 90  | 109 |
| DT | 10 | 12  | 39  | 47  | 66  | 58  | 73  | 90  |
| DT | 28 | 55  | 75  | 86  | 67  | 68  | 85  | 105 |
| DT | 13 | 38  | 46  | 66  | 60  | 65  | 66  | 85  |
| DT | 51 | 75  | 82  | 79  | 64  | 94  | 84  | 86  |
| DT | 65 | 97  | 96  | 107 | 129 | 139 | 133 | 100 |
| DT | 57 | 96  | 119 | 145 | 158 | 163 | 164 | 162 |
| DT | 22 | 7   | 57  | 38  | 49  | 83  | 84  | 98  |
| DT | 44 | 41  | 33  | 35  | 70  | 80  | 95  | 99  |
