# Supplementary material for: Reduction of oxidative-nitrosative stress underlies anticataract effect of topically applied tocotrienol in streptozotocin-induced diabetic rats
Source: PubMed Central journal article supplement (PMC5370128; doi:10.1371/journal.pone.0174542), 2017-03-28
Supplement: pone.0174542.s003.pdf [file pone.0174542.s003.pdf]

|    |   |   |   |   |   |   |   |   |   |
|----|---|---|---|---|---|---|---|---|---|
| DV | 0 | 0 | 0 | 1 | 2 | 2 | 3 | 3 | 4 |
| DV | 0 | 0 | 0 | 0 | 0 | 1 | 1 | 1 | 2 |
| DV | 0 | 0 | 0 | 0 | 1 | 1 | 2 | 2 | 2 |
| DV | 0 | 0 | 0 | 0 | 0 | 0 | 1 | 1 | 1 |
| DV | 0 | 0 | 0 | 0 | 0 | 0 | 1 | 1 | 1 |
| DV | 0 | 0 | 0 | 1 | 1 | 1 | 1 | 1 | 1 |
| DV | 0 | 0 | 0 | 1 | 1 | 1 | 1 | 1 | 1 |
| DV | 0 | 0 | 0 | 1 | 1 | 1 | 1 | 2 | 3 |
| DV | 0 | 0 | 0 | 1 | 1 | 1 | 1 | 1 | 1 |
| DV | 0 | 0 | 0 | 1 | 2 | 2 | 2 | 2 | 2 |
| DV | 0 | 0 | 0 | 1 | 2 | 2 | 2 | 2 | 2 |
| DV | 0 | 0 | 0 | 1 | 1 | 1 | 1 | 1 | 1 |
| DV | 0 | 0 | 0 | 1 | 1 | 1 | 1 | 2 | 2 |
| DV | 0 | 0 | 0 | 0 | 1 | 1 | 1 | 1 | 2 |
| DV | 0 | 0 | 0 | 0 | 1 | 1 | 2 | 2 | 2 |
| DV | 0 | 0 | 0 | 0 | 1 | 1 | 1 | 1 | 1 |
| DV | 0 | 0 | 0 | 1 | 1 | 1 | 1 | 1 | 1 |
| DV | 0 | 0 | 0 | 1 | 3 | 3 | 3 | 3 | 3 |
| DV | 0 | 0 | 0 | 1 | 3 | 3 | 3 | 3 | 4 |
| DV | 0 | 0 | 0 | 1 | 1 | 1 | 1 | 1 | 1 |
| DV | 0 | 0 | 0 | 1 | 1 | 1 | 1 | 1 | 1 |
| DV | 0 | 0 | 0 | 1 | 2 | 3 | 3 | 3 | 3 |
| DV | 0 | 0 | 0 | 1 | 2 | 3 | 3 | 3 | 3 |
| DV | 0 | 0 | 0 | 0 | 0 | 1 | 1 | 2 | 2 |
| DV | 0 | 0 | 0 | 1 | 1 | 1 | 2 | 2 | 2 |
| DV | 0 | 0 | 0 | 0 | 0 | 2 | 2 | 2 | 2 |
| DV | 0 | 0 | 0 | 0 | 1 | 2 | 2 | 2 | 2 |
| DV | 0 | 0 | 0 | 0 | 1 | 1 | 2 | 2 | 2 |
| DV | 0 | 0 | 0 | 0 | 1 | 1 | 1 | 2 | 2 |
| DV | 0 | 0 | 1 | 2 | 2 | 2 | 2 | 2 | 3 |
| DV | 0 | 0 | 1 | 2 | 2 | 2 | 2 | 2 | 2 |
| DV | 0 | 0 | 0 | 1 | 1 | 1 | 2 | 2 | 2 |
| DV | 0 | 0 | 0 | 1 | 1 | 1 | 2 | 2 | 3 |
| DV | 0 | 0 | 0 | 1 | 2 | 3 | 3 | 3 | 3 |
| DV | 0 | 0 | 0 | 1 | 2 | 2 | 2 | 2 | 3 |
| DV | 0 | 0 | 0 | 0 | 1 | 1 | 1 | 1 | 1 |
| DV | 0 | 0 | 0 | 1 | 1 | 1 | 1 | 1 | 1 |
| DV | 0 | 0 | 0 | 0 | 1 | 1 | 2 | 3 | 3 |
| DV | 0 | 0 | 0 | 1 | 1 | 1 | 1 | 2 | 2 |
| DV | 0 | 0 | 0 | 1 | 2 | 3 | 3 | 3 | 3 |
| DV | 0 | 0 | 0 | 1 | 1 | 1 | 1 | 1 | 1 |

|    |   |   |   |   |   |   |   |   |   |
|----|---|---|---|---|---|---|---|---|---|
| DV | 0 | 0 | 0 | 1 | 3 | 3 | 3 | 3 | 3 |
| DV | 0 | 0 | 0 | 1 | 1 | 2 | 3 | 3 | 3 |
| DV | 0 | 0 | 0 | 0 | 0 | 2 | 2 | 2 | 2 |
| DV | 0 | 0 | 0 | 0 | 0 | 2 | 2 | 3 | 3 |
| DV | 0 | 0 | 0 | 1 | 1 | 1 | 1 | 2 | 3 |
| DV | 0 | 0 | 0 | 1 | 1 | 1 | 1 | 2 | 2 |
| DV | 0 | 0 | 0 | 1 | 2 | 3 | 3 | 3 | 3 |
| DV | 0 | 0 | 0 | 1 | 1 | 2 | 2 | 2 | 2 |
| DV | 0 | 0 | 0 | 1 | 1 | 1 | 2 | 3 | 4 |
| DV | 0 | 0 | 0 | 1 | 1 | 1 | 2 | 3 | 3 |
| DV | 0 | 0 | 0 | 1 | 1 | 1 | 1 | 1 | 1 |
| DV | 0 | 0 | 0 | 1 | 1 | 1 | 1 | 1 | 1 |
| DV | 0 | 0 | 0 | 0 | 0 | 1 | 1 | 2 | 2 |
| DV | 0 | 0 | 0 | 0 | 0 | 1 | 1 | 2 | 3 |
| DV | 0 | 0 | 0 | 0 | 1 | 1 | 1 | 3 | 3 |
| DV | 0 | 0 | 0 | 0 | 1 | 1 | 1 | 2 | 2 |
| DV | 0 | 0 | 0 | 1 | 1 | 1 | 1 | 1 | 3 |
| DV | 0 | 0 | 0 | 1 | 1 | 1 | 1 | 1 | 2 |
| DV | 0 | 0 | 0 | 0 | 0 | 1 | 2 | 2 | 2 |
| DV | 0 | 0 | 0 | 0 | 0 | 1 | 2 | 2 | 2 |
| DV | 0 | 0 | 0 | 1 | 2 | 2 | 2 | 2 | 3 |
| DV | 0 | 0 | 0 | 1 | 2 | 2 | 2 | 2 | 3 |
| DV | 0 | 0 | 0 | 1 | 1 | 1 | 2 | 2 | 2 |
| DV | 0 | 0 | 0 | 1 | 1 | 1 | 1 | 1 | 2 |
| DV | 0 | 0 | 0 | 1 | 1 | 1 | 1 | 1 | 2 |
| DV | 0 | 0 | 0 | 1 | 1 | 2 | 2 | 3 | 4 |
| DV | 0 | 0 | 0 | 1 | 1 | 2 | 2 | 3 | 3 |
| DV | 0 | 0 | 0 | 1 | 2 | 3 | 3 | 4 | 4 |
| DV | 0 | 0 | 0 | 1 | 2 | 2 | 3 | 4 | 4 |
| DV | 0 | 0 | 0 | 1 | 2 | 2 | 2 | 2 | 2 |
| DV | 0 | 0 | 0 | 1 | 2 | 2 | 2 | 2 | 2 |
| DV | 0 | 0 | 0 | 1 | 2 | 2 | 2 | 3 | 3 |
| DV | 0 | 0 | 0 | 1 | 2 | 3 | 3 | 3 | 3 |
| DV | 0 | 0 | 0 | 1 | 1 | 2 | 2 | 2 | 2 |
| DV | 0 | 0 | 0 | 1 | 2 | 2 | 2 | 2 | 2 |
| DT | 0 | 0 | 0 | 1 | 1 | 1 | 1 | 1 | 2 |
| DT | 0 | 0 | 0 | 1 | 1 | 1 | 1 | 2 | 2 |
| DT | 0 | 0 | 0 | 1 | 1 | 1 | 2 | 2 | 2 |
| DT | 0 | 0 | 0 | 1 | 2 | 2 | 2 | 2 | 2 |
| DT | 0 | 0 | 0 | 1 | 1 | 1 | 1 | 1 | 1 |

|    |   |   |   |   |   |   |   |   |   |
|----|---|---|---|---|---|---|---|---|---|
| DT | 0 | 0 | 0 | 1 | 1 | 1 | 1 | 1 | 1 |
| DT | 0 | 0 | 0 | 1 | 1 | 1 | 1 | 1 | 1 |
| DT | 0 | 0 | 0 | 1 | 1 | 1 | 1 | 1 | 1 |
| DT | 0 | 0 | 0 | 0 | 0 | 1 | 1 | 2 | 2 |
| DT | 0 | 0 | 0 | 0 | 0 | 0 | 1 | 2 | 2 |
| DT | 0 | 0 | 1 | 2 | 2 | 2 | 2 | 2 | 2 |
| DT | 0 | 0 | 1 | 2 | 2 | 2 | 2 | 2 | 2 |
| DT | 0 | 0 | 0 | 1 | 1 | 2 | 3 | 3 | 3 |
| DT | 0 | 0 | 1 | 2 | 2 | 2 | 2 | 2 | 2 |
| DT | 0 | 0 | 0 | 1 | 1 | 1 | 1 | 1 | 1 |
| DT | 0 | 0 | 0 | 1 | 1 | 1 | 1 | 1 | 1 |
| DT | 0 | 0 | 0 | 1 | 1 | 1 | 1 | 2 | 2 |
| DT | 0 | 0 | 0 | 1 | 1 | 1 | 1 | 2 | 2 |
| DT | 0 | 0 | 0 | 1 | 2 | 3 | 3 | 3 | 3 |
| DT | 0 | 0 | 0 | 1 | 2 | 2 | 2 | 2 | 2 |
| DT | 0 | 0 | 0 | 1 | 2 | 3 | 3 | 3 | 3 |
| DT | 0 | 0 | 0 | 1 | 1 | 2 | 2 | 2 | 2 |
| DT | 0 | 0 | 0 | 1 | 1 | 2 | 2 | 2 | 2 |
| DT | 0 | 0 | 0 | 1 | 1 | 1 | 2 | 2 | 3 |
| DT | 0 | 0 | 0 | 1 | 1 | 1 | 1 | 2 | 2 |
| DT | 0 | 0 | 0 | 1 | 1 | 1 | 1 | 2 | 2 |
| DT | 0 | 0 | 0 | 1 | 1 | 1 | 2 | 2 | 3 |
| DT | 0 | 0 | 0 | 1 | 1 | 1 | 2 | 2 | 3 |
| DT | 0 | 0 | 0 | 1 | 1 | 1 | 1 | 1 | 1 |
| DT | 0 | 0 | 0 | 1 | 1 | 1 | 1 | 1 | 1 |
| DT | 0 | 0 | 0 | 1 | 1 | 2 | 2 | 2 | 2 |
| DT | 0 | 0 | 0 | 0 | 2 | 2 | 2 | 3 | 3 |
| DT | 0 | 0 | 0 | 0 | 1 | 1 | 1 | 1 | 1 |
| DT | 0 | 0 | 0 | 0 | 1 | 1 | 1 | 1 | 1 |
| DT | 0 | 0 | 0 | 1 | 1 | 2 | 2 | 2 | 2 |
| DT | 0 | 0 | 0 | 0 | 2 | 2 | 2 | 3 | 3 |
| DT | 0 | 0 | 0 | 0 | 1 | 1 | 1 | 1 | 1 |
| DT | 0 | 0 | 0 | 0 | 0 | 0 | 0 | 0 | 0 |
| DT | 0 | 0 | 0 | 1 | 1 | 1 | 1 | 1 | 3 |
| DT | 0 | 0 | 0 | 1 | 2 | 2 | 2 | 2 | 2 |
| DT | 0 | 0 | 0 | 1 | 1 | 1 | 2 | 2 | 2 |
| DT | 0 | 0 | 0 | 1 | 2 | 2 | 2 | 2 | 2 |
| DT | 0 | 0 | 0 | 1 | 1 | 1 | 1 | 1 | 1 |
| DT | 0 | 0 | 0 | 1 | 1 | 1 | 1 | 1 | 1 |

|    |   |   |   |   |   |   |   |   |   |
|----|---|---|---|---|---|---|---|---|---|
| DT | 0 | 0 | 0 | 0 | 1 | 1 | 1 | 1 | 2 |
| DT | 0 | 0 | 0 | 0 | 1 | 1 | 1 | 1 | 1 |
| DT | 0 | 0 | 0 | 0 | 0 | 0 | 0 | 0 | 2 |
| DT | 0 | 0 | 0 | 0 | 1 | 1 | 1 | 1 | 1 |
| DT | 0 | 0 | 0 | 0 | 0 | 0 | 0 | 1 | 1 |
| DT | 0 | 0 | 0 | 0 | 0 | 0 | 0 | 1 | 1 |
| DT | 0 | 0 | 0 | 0 | 0 | 1 | 1 | 1 | 1 |
| DT | 0 | 0 | 0 | 0 | 0 | 0 | 1 | 1 | 1 |
| DT | 0 | 0 | 0 | 1 | 1 | 1 | 1 | 1 | 1 |
| DT | 0 | 0 | 0 | 1 | 1 | 1 | 1 | 1 | 2 |
| DT | 0 | 0 | 0 | 0 | 0 | 0 | 0 | 1 | 2 |
| DT | 0 | 0 | 0 | 0 | 0 | 0 | 0 | 1 | 3 |
| DT | 0 | 0 | 0 | 1 | 1 | 1 | 1 | 1 | 1 |
| DT | 0 | 0 | 0 | 1 | 1 | 1 | 1 | 2 | 2 |
| DT | 0 | 0 | 0 | 1 | 1 | 2 | 2 | 2 | 2 |
| DT | 0 | 0 | 0 | 1 | 1 | 2 | 2 | 2 | 2 |
| DT | 0 | 0 | 0 | 1 | 1 | 2 | 2 | 2 | 3 |
| DT | 0 | 0 | 0 | 1 | 1 | 2 | 2 | 2 | 2 |
| DT | 0 | 0 | 0 | 1 | 1 | 1 | 2 | 2 | 2 |
| DT | 0 | 0 | 0 | 1 | 1 | 1 | 1 | 1 | 3 |
| DT | 0 | 0 | 0 | 0 | 1 | 1 | 1 | 1 | 1 |
| DT | 0 | 0 | 0 | 0 | 0 | 0 | 0 | 0 | 1 |
| DT | 0 | 0 | 0 | 1 | 1 | 1 | 1 | 1 | 1 |
| DT | 0 | 0 | 0 | 1 | 1 | 2 | 2 | 2 | 2 |
| DT | 0 | 0 | 0 | 1 | 1 | 1 | 1 | 1 | 1 |
| DT | 0 | 0 | 0 | 1 | 1 | 1 | 1 | 1 | 1 |
| DT | 0 | 0 | 0 | 1 | 2 | 2 | 2 | 2 | 2 |
| DT | 0 | 0 | 0 | 1 | 2 | 2 | 2 | 2 | 2 |
| DT | 0 | 0 | 0 | 1 | 1 | 1 | 2 | 2 | 2 |
| DT | 0 | 0 | 0 | 1 | 1 | 1 | 1 | 1 | 1 |
| DT | 0 | 0 | 0 | 1 | 1 | 1 | 2 | 2 | 3 |
| DT | 0 | 0 | 0 | 1 | 1 | 1 | 1 | 2 | 2 |
