# Supplementary material for: Reduction of oxidative-nitrosative stress underlies anticataract effect of topically applied tocotrienol in streptozotocin-induced diabetic rats
Source: PubMed Central journal article supplement (PMC5370128; doi:10.1371/journal.pone.0174542), 2017-03-28
Supplement: pone.0174542.s004.pdf [file pone.0174542.s004.pdf]

| Group | Parameters                            |                                |                            |                      |                          |                        |                                |                             |                          |                           |                          |                                                                                   |                                                  |                                                   |
|-------|---------------------------------------|--------------------------------|----------------------------|----------------------|--------------------------|------------------------|--------------------------------|-----------------------------|--------------------------|---------------------------|--------------------------|-----------------------------------------------------------------------------------|--------------------------------------------------|---------------------------------------------------|
|       | Aldose Reductase (ng/mg lens protein) | Sorbitol (units/g lens weight) | pIκBα (pg/ug lens protein) | NFκB (pg/mg protein) | iNOS (ng/g lens protein) | MDA (μM/g lens weight) | Catalase (μmol/g lens protein) | SOD (units/mg lens protein) | GSH (μmol/g lens weight) | 3-NT (ng/mg lens protein) | ATP (pmol/g lens weight) | Na <sup>+</sup> K <sup>+</sup> ATPase activity (nmol Pi liberated/mg protein/min) | PMCA activity (μmol Pi liberated/mg protein/min) | SERCA activity (μmol Pi liberated/mg protein/min) |
| N     | 2.1912                                | 4.2464                         | 2.4745                     | 622.2552             | 989.7800                 | 896.9156               | 62.9653                        | 9.8444                      | 5.5421                   | 8.6194                    | 850.5354                 | 3.2218                                                                            | 2.8585                                           | 1.1680                                            |
| N     | 2.2798                                | 4.6379                         | 3.2504                     | 694.1662             | 901.3981                 | 954.8105               | 60.6244                        | 9.2441                      | 4.9838                   | 8.1597                    | 837.0385                 | 2.4562                                                                            | 3.2956                                           | 1.3211                                            |
| N     | 1.8864                                | 4.7815                         | 3.5378                     | 675.4436             | 952.0816                 | 917.7741               | 84.5971                        | 8.9862                      | 5.5836                   | 8.6352                    | 1044.9496                | 2.6746                                                                            | 3.1490                                           | 2.1203                                            |
| N     | 1.9459                                | 4.2176                         | 3.1569                     | 815.1200             | 1011.8126                | 931.7460               | 70.8862                        | 9.4015                      | 5.3635                   | 8.7951                    | 884.5004                 | 3.3702                                                                            | 3.6656                                           | 1.0644                                            |
| N     | 2.5881                                | 4.6181                         | 3.2380                     | 632.3922             | 779.5538                 | 897.8405               | 65.4495                        | 9.0138                      | 5.7972                   | 8.6839                    | 852.0639                 | 2.1067                                                                            | 2.7982                                           | 1.8298                                            |
| N     | 2.2803                                | 4.7233                         | 3.3548                     | 662.6788             | 954.7450                 | 820.6349               | 50.3992                        | 9.1498                      | 5.6860                   | 8.8284                    | 937.5866                 | 2.5413                                                                            | 3.2662                                           | 2.4323                                            |
| DV    | 2.8616                                | 5.8028                         | 3.8661                     | 1575.4917            | 1117.2938                | 1042.2932              | 116.5535                       | 6.8786                      | 2.4952                   | 9.3252                    | 823.4424                 | 2.0180                                                                            | 2.3824                                           | 1.3994                                            |
| DV    | 3.1989                                | 6.4745                         | 4.2833                     | 1312.1585            | 1135.5036                | 1095.9184              | 151.5145                       | 8.0365                      | 2.3199                   | 10.6683                   | 799.8207                 | 1.2729                                                                            | 2.8120                                           | 1.0763                                            |
| DV    | 3.2620                                | 6.5470                         | 4.5040                     | 1426.8300            | 1359.7064                | 1175.7519              | 147.9707                       | 6.5711                      | 2.5254                   | 9.5050                    | 786.3904                 | 1.4870                                                                            | 2.9916                                           | 1.1996                                            |
| DV    | 3.5233                                | 6.7842                         | 3.6379                     | 1618.2637            | 1140.0622                | 1195.4365              | 122.1227                       | 6.4217                      | 2.7476                   | 9.5275                    | 862.8942                 | 1.3187                                                                            | 2.2380                                           | 1.5906                                            |
| DV    | 2.9458                                | 6.1098                         | 3.6100                     | 1706.6441            | 1072.5924                | 1069.4981              | 107.5179                       | 6.7350                      | 2.6726                   | 9.4702                    | 785.9385                 | 2.7868                                                                            | 2.5573                                           | 1.5816                                            |
| DV    | 2.8885                                | 5.6562                         | 3.3715                     | 1693.4409            | 1187.0829                | 1279.3367              | 170.8338                       | 8.3472                      | 2.5202                   | 9.9858                    | 766.1785                 | 2.6498                                                                            | 2.6188                                           | 1.1264                                            |
| DT    | 2.8286                                | 5.6043                         | 3.6795                     | 866.8727             | 909.8309                 | 960.9635               | 59.5391                        | 9.7934                      | 2.7954                   | 9.0585                    | 936.7578                 | 2.7172                                                                            | 3.1001                                           | 2.0250                                            |
| DT    | 2.4671                                | 5.5625                         | 3.0475                     | 928.4775             | 884.4320                 | 988.9456               | 86.3037                        | 10.6292                     | 2.8743                   | 8.2924                    | 788.6712                 | 2.8609                                                                            | 3.7275                                           | 1.9027                                            |
| DT    | 2.6368                                | 5.5281                         | 2.9517                     | 868.7069             | 983.5257                 | 955.7823               | 47.420835                      | 8.8786                      | 3.0519                   | 8.4767                    | 903.0221                 | 3.0407                                                                            | 2.8474                                           | 1.7419                                            |
| DT    | 2.7502                                | 5.0925                         | 3.5308                     | 789.0014             | 995.3909                 | 974.2525               | 84.50257                       | 9.7510                      | 3.5119                   | 9.2355                    | 855.7748                 | 2.2995                                                                            | 3.4149                                           | 1.4243                                            |
| DT    | 2.6896                                | 4.8982                         | 3.6464                     | 905.5971             | 1052.0660                | 1010.5519              | 53.207227                      | 9.8803                      | 3.6627                   | 8.6645                    | 859.7247                 | 2.3437                                                                            | 3.5704                                           | 1.5104                                            |
| DT    | 2.7618                                | 4.9997                         | 3.2095                     | 716.2488             | 1056.6498                | 913.0435               | 61.655192                      | 9.4827                      | 3.2326                   | 7.9703                    | 839.8591                 | 2.5192                                                                            | 3.4332                                           | 1.4366                                            |

| Group | Calpain<br>(pg/mg<br>lens<br>protein) | Total<br>protein<br>(mg/g<br>lens<br>weight) | Soluble<br>protein<br>(mg/g<br>lens<br>weight) | Insoluble<br>protein<br>(mg/g<br>lens<br>weight) | Soluble:<br>Insolubl<br>e<br>protein<br>(ratio) |
|-------|---------------------------------------|----------------------------------------------|------------------------------------------------|--------------------------------------------------|-------------------------------------------------|
| N     | 315.6393                              | 479.3190                                     | 305.9653                                       | 173.3537                                         | 1.7650                                          |
| N     | 356.3861                              | 460.4858                                     | 319.5935                                       | 140.8923                                         | 2.2684                                          |
| N     | 359.8263                              | 486.6766                                     | 289.5130                                       | 197.1636                                         | 1.4684                                          |
| N     | 358.3222                              | 502.0816                                     | 346.1946                                       | 194.4900                                         | 1.7800                                          |
| N     | 359.7063                              | 437.7156                                     | 307.5916                                       | 149.3428                                         | 2.0596                                          |
| N     | 348.0058                              | 476.3902                                     | 288.3728                                       | 130.1956                                         | 2.2149                                          |
| DV    | 385.8401                              | 439.5317                                     | 259.1055                                       | 228.9214                                         | 1.1319                                          |
| DV    | 420.9828                              | 424.3661                                     | 278.5644                                       | 225.8354                                         | 1.2335                                          |
| DV    | 396.8950                              | 508.6407                                     | 286.8102                                       | 253.2660                                         | 1.1324                                          |
| DV    | 390.2426                              | 516.0187                                     | 287.0973                                       | 180.4262                                         | 1.5912                                          |
| DV    | 383.1912                              | 510.9830                                     | 285.1476                                       | 145.8017                                         | 1.9557                                          |
| DV    | 392.2591                              | 541.8900                                     | 288.6239                                       | 221.8306                                         | 1.3011                                          |
| DT    | 344.5403                              | 447.3568                                     | 309.5972                                       | 137.7596                                         | 2.2474                                          |
| DT    | 360.4892                              | 505.9502                                     | 306.3030                                       | 191.5610                                         | 1.5990                                          |
| DT    | 345.0266                              | 425.8095                                     | 314.3891                                       | 129.5430                                         | 2.4269                                          |
| DT    | 369.2331                              | 487.6583                                     | 296.2665                                       | 164.6654                                         | 1.7992                                          |
| DT    | 354.9786                              | 452.5783                                     | 322.9929                                       | 146.2753                                         | 2.2081                                          |
| DT    | 363.0694                              | 493.5989                                     | 320.1280                                       | 173.4709                                         | 1.8454                                          |
